# Supplementary material for: MicroRNA-3613-3p functions as a tumor suppressor and represents a novel therapeutic target in breast cancer
Source: Springer Nature journal article supplement (doi:10.1186/s13058-021-01389-9), 2021-01-25
Supplement: MOESM5 [file 18798790]

A

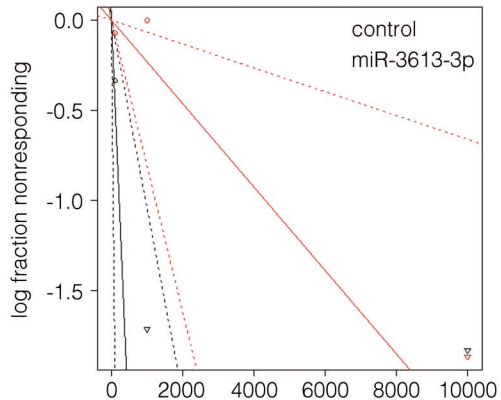

B

Confidence intervals for  $1 / (\text{stem cell frequency})$

| Group       | Lower | Estimate | Upper  |
|-------------|-------|----------|--------|
| control     | 962   | 217      | 49.2   |
| miR-3613-3p | 15139 | 4326     | 1236.7 |
