# Supplementary material for: MicroRNA-3613-3p functions as a tumor suppressor and represents a novel therapeutic target in breast cancer
Source: Springer Nature journal article supplement (doi:10.1186/s13058-021-01389-9), 2021-01-25

A

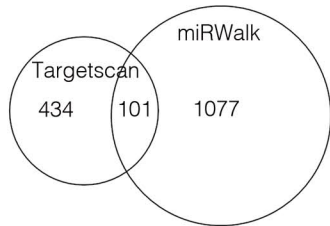

B

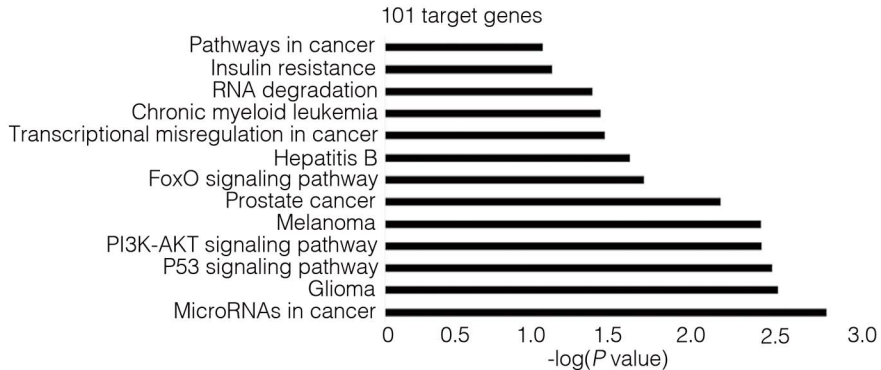

Supplement: MOESM6 [file 18798790]
