# Supplementary material for: MicroRNA-3613-3p functions as a tumor suppressor and represents a novel therapeutic target in breast cancer
Source: Springer Nature journal article supplement (doi:10.1186/s13058-021-01389-9), 2021-01-25
Supplement: MOESM11 [file 18798790]

A

Position 185-192 of SMS 3' UTR: 5' GAGCUUAGGGUGUUUUUUUUUUGA 3'  
 Hsa-miR-3613-3p miRNA: 3' CUUCCCAACCCGAAAAAAAAAACA 5'

Position 805-811 of PFAFH1B2 3' UTR: 5' UACAAGCUUUUAAACACAUUUUUUGA 3'  
 Hsa-miR-3613-3p miRNA: 3' CUUCCCAACCCGAAAAAAAAAACA 5'

Position 915-921 of PDK3 3' UTR: 5' AAGGCCUCUCUAGUUUUAUUUUUGA 3'  
 Hsa-miR-3613-3p miRNA: 3' CUUCCCAACCCGAAAAAAAAAACA 5'

B

NEAT1 lncRNA: 5' GAAAUUUUAGGCUCCAGUUUUUGU 3'  
 Hsa-miR-3613-3p miRNA: 3' CUUCCCAACCCGAAAAAAAAAACA 5'

SNHG16 lncRNA: 5' ACCACACCUGGCUGAUUUUUUUUGU 3'  
 Hsa-miR-3613-3p miRNA: 3' CUUCCCAACCCGAA AAAAAAAAAACA 5'
